# Supplementary material for: Tsunamis caused by submarine slope failures along western Great Bahama Bank
Source: PubMed Central journal article supplement (PMC5095707; doi:10.1038/srep35925), 2016-11-04

# Supplementary Material - Tsunamis caused by submarine slope failures along western Great Bahama Bank

**Jara S.D. Schnyder<sup>1,\*</sup>, Gregor P. Eberli<sup>1</sup>, James T. Kirby<sup>2</sup>, Fengyan Shi<sup>2</sup>, Babak Tehranirad<sup>2</sup>, Thierry Mulder<sup>3</sup>, Emmanuelle Ducassou<sup>3</sup>, Dierk Hebbeln<sup>4</sup>, Paul Wintersteller<sup>4</sup>**

<sup>1</sup> *CSL-Center for Carbonate Research, University of Miami, 4600 Rickenbacker Cswy., 33149 Miami, USA.*

<sup>2</sup> *Center for Applied Coastal Research, University of Delaware, Newark, DE 19718, USA.*

<sup>3</sup> *UMR 5805 EPOC, Université de Bordeaux, 33615 Pessac Cedex, France.*

<sup>4</sup> *MARUM-Center for Marine Environmental Sciences, University of Bremen, Bremen, Germany.*

[\\*jschnyder@rsmas.miami.edu](mailto:*jschnyder@rsmas.miami.edu)

Video V1: Movie of tsunami propagation for the partial landslide scenario. (Movie was created in MATLAB r2014a using GEBCO grids, <http://www.gebco.net>).

Video V2: Movie of tsunami propagation for the single landslide scenario. (Movie was created in MATLAB r2014a using GEBCO grids, <http://www.gebco.net>).

Video V3: Movie of tsunami propagation for the potential future landslide scenario. (Movie was created in MATLAB r2014a using GEBCO grids, <http://www.gebco.net>).

Video V4: Movie of tsunami propagation for the margin failure scenario. (Movie was created in MATLAB r2014a using GEBCO grids, <http://www.gebco.net>).

Figure S1: Factor of safety, p-wave velocity, and lithologic column for sites 1003A and 1005A from IODP Leg 166. Data was obtained from Eberli et al., (1997).

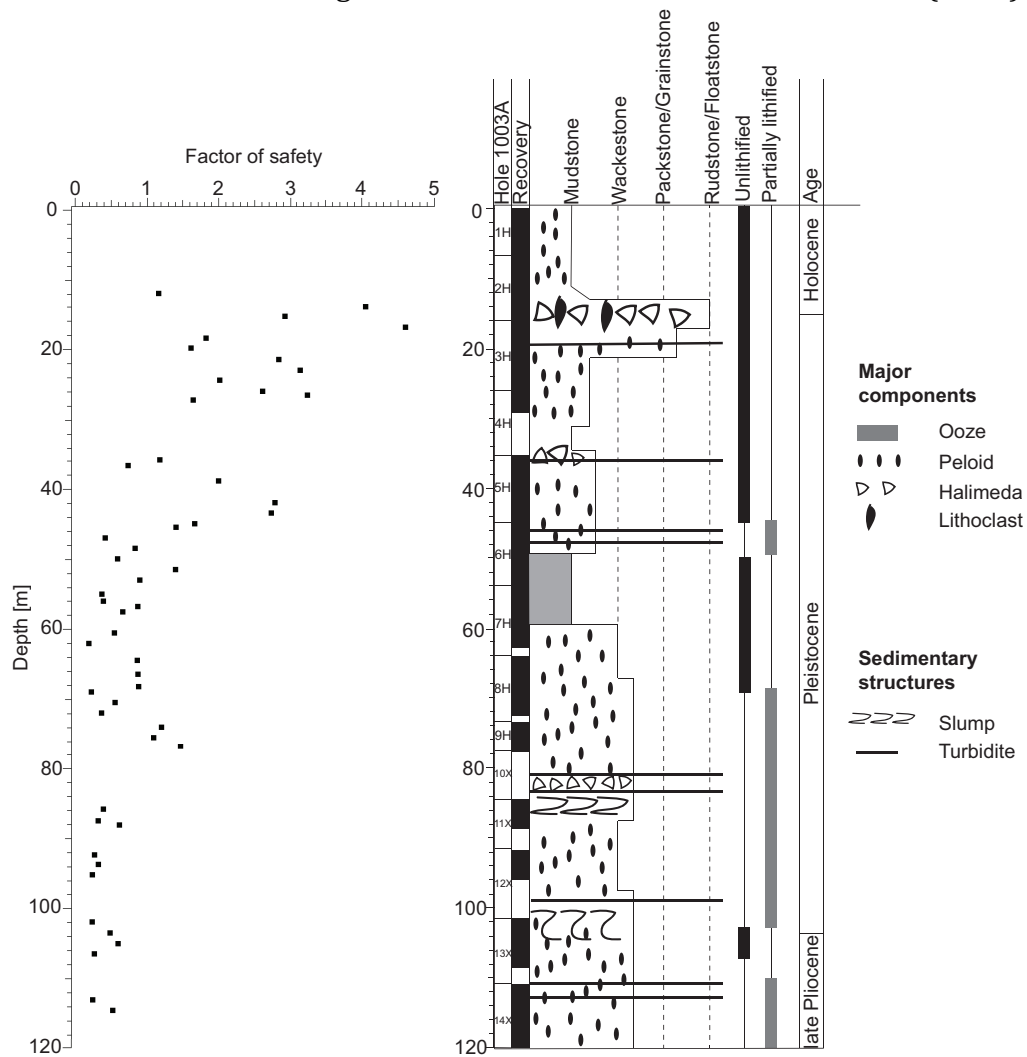

Figure S2: Peak wave height maps for all the simulations. Units are in meters. (Maps were created in MATLAB r2014a using GEBCO grids, <http://www.gebco.net>).

a) Partial landslide 20 m/s and 35.8 m/s;

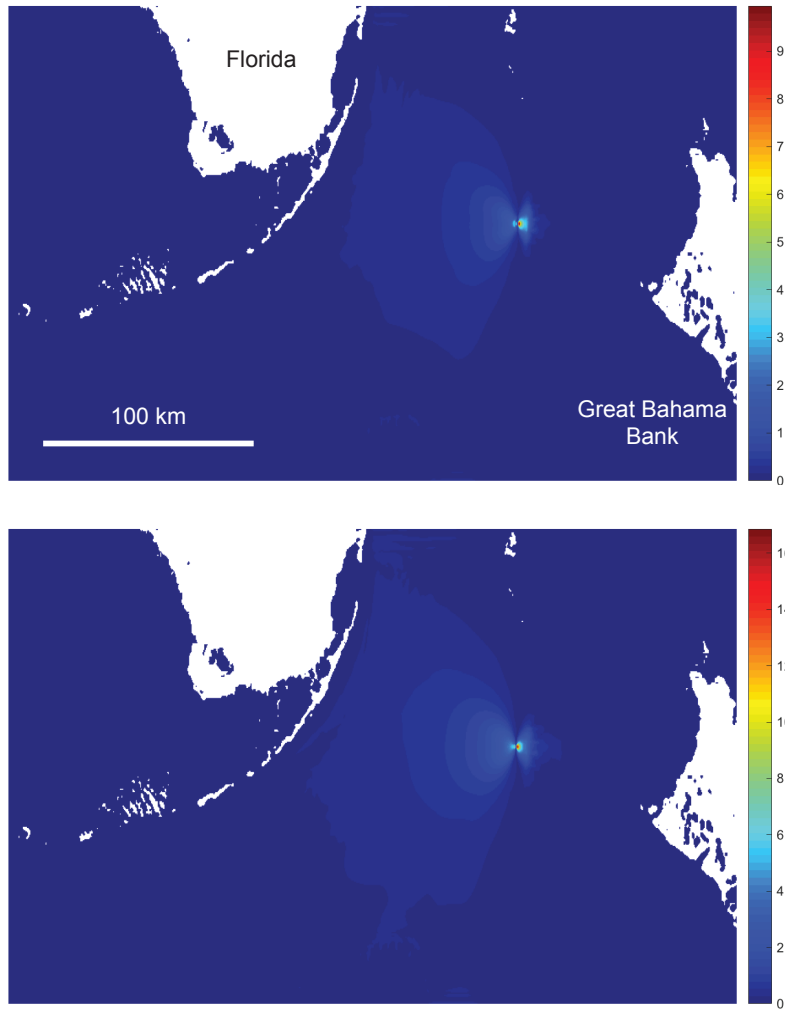

b) Single landslide 20 m/s and 38.7 m/s;

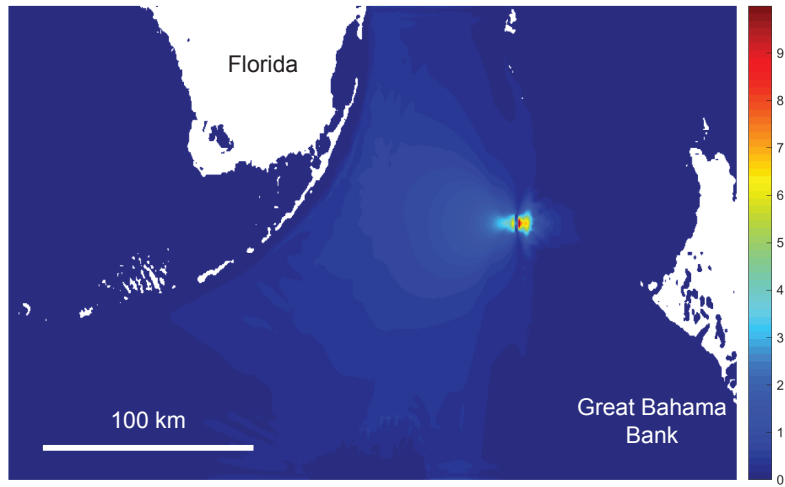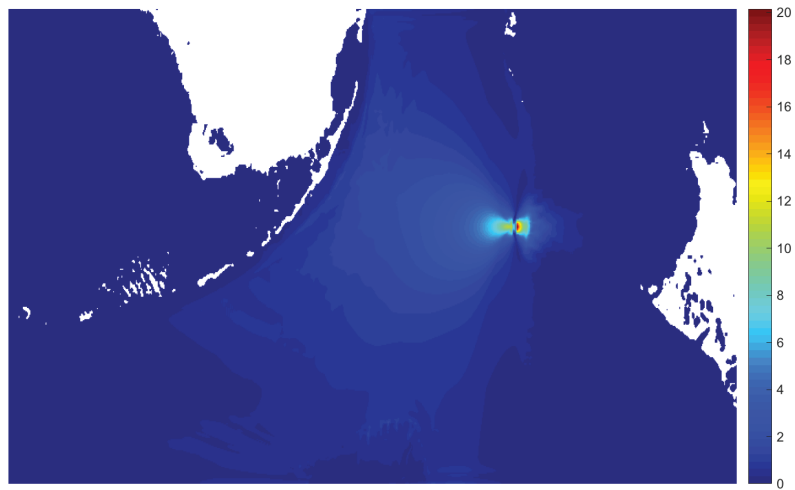

c) Potential future landslide 20 m/s and 48.32 m/s;

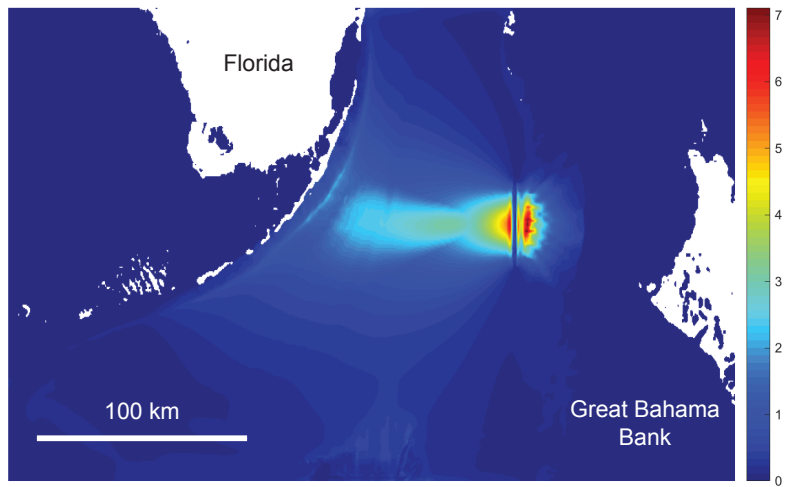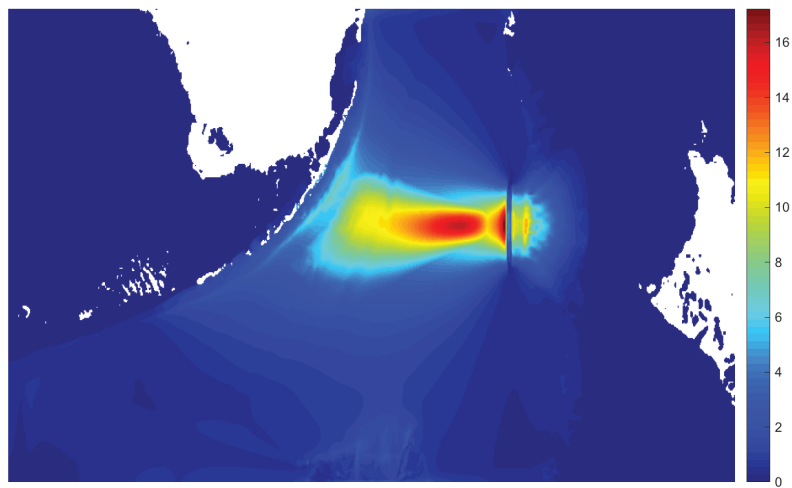

d) Margin collapse 20 m/s and 60.25 m/s;

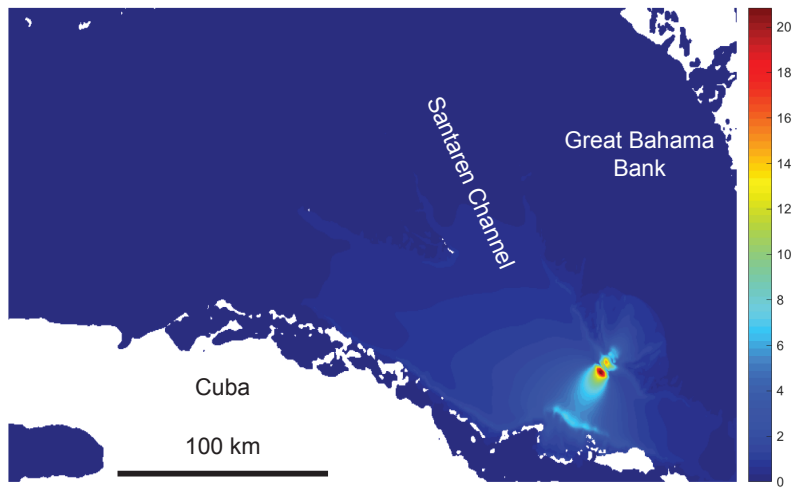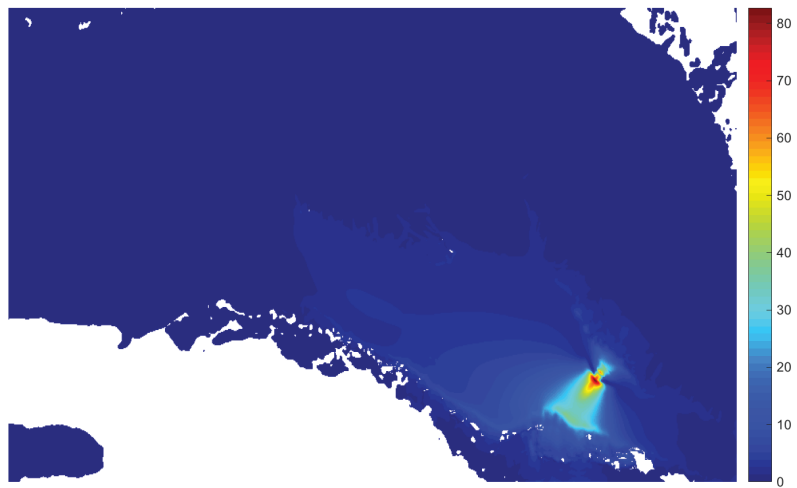

Supplement: srep35925-s5.pdf [file srep35925-s5.pdf]
